# Supplementary material
Source: PubMed Central journal article supplement (PMC3206631)
Supplement: NIHMS316668-supplement-Supplementary_data.pdf [file NIHMS316668-supplement-Supplementary_data.pdf]

**Table S1. Primer sequences**

|                         | Forward                               | Reverse                       |
|-------------------------|---------------------------------------|-------------------------------|
| <b>BS</b>               |                                       |                               |
| OPCML                   | GTTTTTTTGTAGGGGAAGT                   | TTATTAATCACACACATAAACAA       |
| HOP/OB1                 | TACAACCCTACCTAAAAAAACCCC              | TTTTTTGGGGATAGATTTGATAGAT     |
| MCAM                    | TTTTTAAGTTAGGAGTTTGGGAGTT             | CCATTTACTCAAAAACAAAATAACC     |
| PGP9.5                  | ACTCAAAAACACCCACCAACAAAT              | GTAGAAATAGTTTAGGGAAGA         |
| DLC                     | CCAAATAAATACCTTATAACCTTTA             | GAGGTGCGGTATGTTTTGGT          |
| NMDAR2B                 | ATACC AACTA TTTTC AATTC CTCTC         | ATAAT GTAGA ATTTA GAGTA ATTAT |
| <b>MSP (M-SP)</b>       |                                       |                               |
| B4GALT1                 | GGTAGAAAAAGGTTATTTAGGAAACG            | AAACACAAAAATAACAACCCGTC       |
| Trypsinogen-4           | CTATACTCGAACTCCTCGCCG                 | TTTCGGTTTTCGGTTAGCGTGC        |
| DCC                     | CGTTGTTTCGCGATTTTTGGTTTC              | ACCGATTACTTAAAAATACGCG        |
| APC                     | TTATATGTGCGTTACGTGCGTTTATAT           | GAACCAAAACGCTCCCCAT           |
| Fhit                    | GGGCGCGGTTTGGGTTTTTAC                 | GAAACAAAACCCACCGCCCCG         |
| p16                     | TTATTAGAGGGTGGGGCGGATCGC              | GACCCCGAACCGCGACCGTAA         |
| SSBP2                   | TCGGTCTGTTTAGTTAGAAGTTC               | GATACCCACGATTAATTTTTACGAT     |
| $\beta$ -actin          | TGGTGATGGAGGAGTTTAGTAAGT              | AACCAATAAACCTACTCCTCCCTTAA    |
| <b>MSP (UnM-SP)</b>     |                                       |                               |
| SSBP2                   | GTTGGTTGTTTAGTTAGAAGTTGA              | AATACCCACAATTAATTTTTACAAT     |
| <b>TaqMan-MSP</b>       |                                       |                               |
| SSBP2                   | ATTTTTGCGGTCGTAGCGGT                  | TTCTACGACAAATCTAACGAA         |
|                         | ATATCCAAAACGCCGCGAACTCC (Probe)       |                               |
| $\beta$ -actin          | TGGTGATGGAGGAGTTTAGTAAGT              | AACCAATAAACCTACTCCTCCCTTAA    |
|                         | ACCACCACCAACACACAATAACAAACACA (Probe) |                               |
| <b>RT-PCR</b>           |                                       |                               |
| NMDAR2B                 | GCCTGAGCGACAAAAAGTTC                  | CATCTCCCCATCTCCAAAGA          |
| DLC                     | TTGAAGCCAAGGAAGCTTGTG                 | TCGTCTGAATCGTCACTTCGT         |
| SSBP2                   | AGTGAAGCAAAAGCCTTCCA                  | GACACCTCCAAGTGCCTGAT          |
| $\beta$ -actin          | TGGCACCACACCTTCTACAATGAGC             | GCACAGCTTCTCCTTAATGTCACGC     |
| <b>Real-time RT-PCR</b> |                                       |                               |
| NMDAR2B                 | ACGGCAGCACAGAGAGAAAT                  | CCTGTTTTTCAGGGAGAGCAA         |
| DLC                     | TTGAAGCCAAGGAAGCTTGTG                 | TCGTCTGAATCGTCACTTCGT         |
| SSBP2                   | AGTGAAGCAAAAGCCTTCCA                  | ATCTCCTGGGGGAATGTTTC          |
| Wnt1                    | CTCATGAACCTTCACAACAACGA               | ATCCCGTGGCACTTGCA             |
| Wnt2                    | CCTGATGAATCTTCACAACAACAGA             | CCGTGGCACTTGCACTCTT           |
| Wnt3a                   | GCCCCACTCGGATACTTCTTACT               | GAGGAATACTGTGGCCCAACA         |
| Wnt7b                   | GCAAGTGGATTTTCTACGTGTTTCT             | TGACAGTCTCCGAGCTTCA           |
| Wnt10b                  | GCGCCAGGTGGTAAGTAACTGAA               | TGCCTGATGTGCCATGACA           |
| $\beta$ -actin          | TGGCACCACACCTTCTACAATGAGC             | GCACAGCTTCTCCTTAATGTCACGC     |

**Table S2. Summary of expression levels in proteins mediating Wnt signaling.**

| Level   |          | TE1                   | MSE-Het-1A     |                       | Het-1A                   |                         | HEK293                   |                         |
|---------|----------|-----------------------|----------------|-----------------------|--------------------------|-------------------------|--------------------------|-------------------------|
|         |          | + pSSBP2 <sup>a</sup> | M <sup>b</sup> | + pSSBP2 <sup>a</sup> | + siR SSBP2 <sup>c</sup> | + Sulindac <sup>d</sup> | + siR SSBP2 <sup>c</sup> | + Sulindac <sup>d</sup> |
| mRNA    | Wnt1     | n/s                   | ↑              | n/s                   | ↑                        | n/s                     | n/s                      | n/s                     |
|         | Wnt2     | n/s                   | ↓              | n/s                   | n/s                      | n/s                     | ↑                        | ↓                       |
|         | Wnt3a    | n/s                   | ↑              | n/s                   | ↑                        | n/s                     | ↑                        | ↓                       |
|         | Wnt7b    | ↓                     | ↑              | ↓                     | n/s                      | n/s                     | n/s                      | n/s                     |
|         | Wnt10b   | n/s                   | n/s            | n/s                   | ↑                        | n/s                     | n/s                      | n/s                     |
| Protein | p-LRP6   | ↓                     | n/c            | n/c                   | ↑                        | ↓                       |                          |                         |
|         | LRP6     | ↓                     | ↑              | ↓                     | ↑                        | ↓                       |                          |                         |
|         | Dvl3     | ↓                     | ↑              | ↓                     | n/c                      | ↓                       |                          |                         |
|         | Axin1    | ↑                     | ↓              | n/c                   | ↓                        | n/c                     |                          |                         |
|         | WIF      |                       | ↑              | n/c                   | ↓                        | n/c                     |                          |                         |
|         | Naked2   | n/e                   | ↓              | n/c                   | n/c                      | ↓                       |                          |                         |
|         | Wnt3a    | ↓                     | ↑              | n/c                   | n/c                      | n/c                     |                          |                         |
|         | Wnt5a/5b |                       | ↑              | n/c                   | ↓                        | n/c                     |                          |                         |
|         | Wnt7b    |                       | n/c            | n/c                   | ↑                        | n/c                     |                          |                         |

Note, mRNA and protein level were assessed by real time-RT-PCR and western blot analysis, respectively.

Statistical analysis was performed to compare mRNA expression level, and  $P < 0.05$  was considered significant (*t*-test).

↑, increase ; ↓, decrease.

n/s, not significant; n/e, not expressed; n/c, not changed; blank, not assessed.

<sup>a</sup>Expression compared with empty vector control-transfectants.

<sup>b</sup>Expression compared with control-Het-1A cells.

<sup>c</sup>Expression compared with control siRNA-transfectants.

<sup>d</sup>Expression compared with SSBP2 siRNA-transfectants in the absence of Sulindac (100 μM).

**Table S3. Immunohistochemical analysis of SSBP2  
in esophagus cancer tissue array with self-matching normal adjacent tissue.**

| Sex (Age) | Position | Pathology | Grade | Expression |
|-----------|----------|-----------|-------|------------|
| F (49)    | A1       | ESCC      | I     | +          |
|           | A2       | ESCC      | I     | +          |
|           | A3       | PN        | -     | ++++       |
|           | A4       | PN        | -     | ++++       |
| M (65)    | A5       | ESCC      | II    | ++         |
|           | A6       | ESCC      | II    | ++         |
|           | A7       | PN        | -     | ++         |
|           | A8       | PN        | -     | ++         |
| M (69)    | B1       | ESCC      | II    | ++         |
|           | B2       | *SM       | -     | ++         |
|           | B3       | PN        | -     | +++        |
|           | B4       | PN        | -     | +++        |
| F (56)    | B5       | ESCC      | II    | +          |
|           | B6       | ESCC      | II    | +          |
|           | B7       | PN        | -     | ++++       |
|           | B8       | PN        | -     | ++++       |
| M (45)    | C1       | ESCC      | III   | +          |
|           | C2       | ESCC      | III   | +          |
|           | C3       | PN        | -     | ++++       |
|           | C4       | PN        | -     | ++++       |
| M (46)    | C5       | ESCC      | II    | ++         |
|           | C6       | ESCC      | II    | ++         |
|           | C7       | PN        | -     | +++        |
|           | C8       | PN        | -     | +++        |

PN, cancer adjacent normal tissue; \*SM, Smooth muscle tissue. -, no grading

Note, expression level is indicated as; +, no or faint expression; ++, mild expression;

+++ , moderate expression; +++++, strong expression.

A

PGP9.5

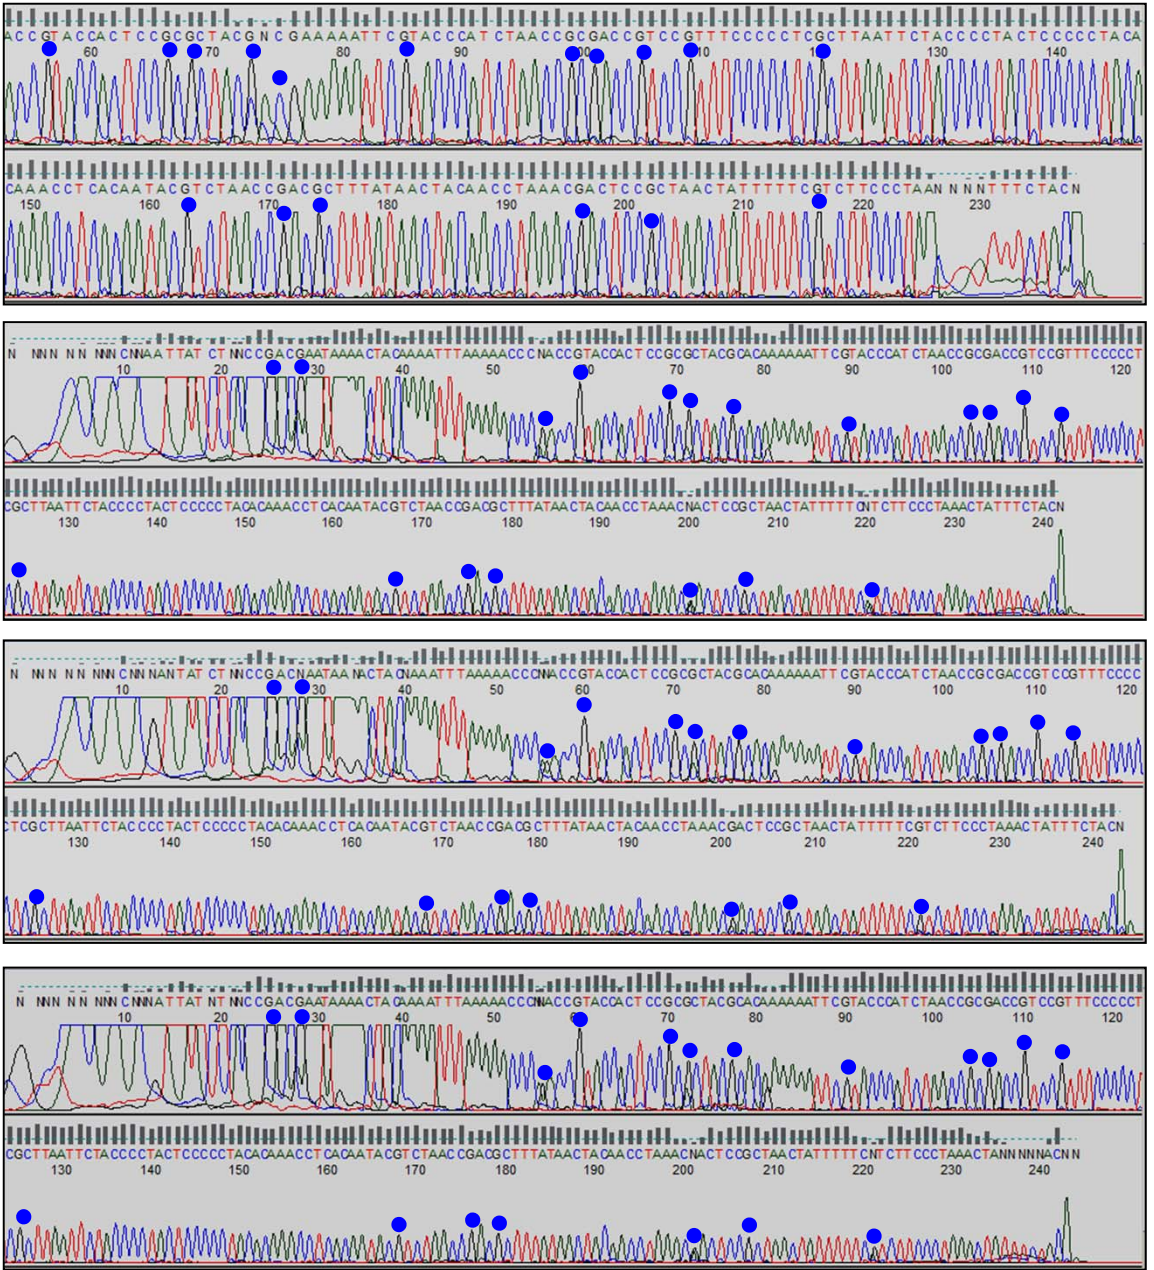

NL

C

M

S

**B**

**HOP/OB1**

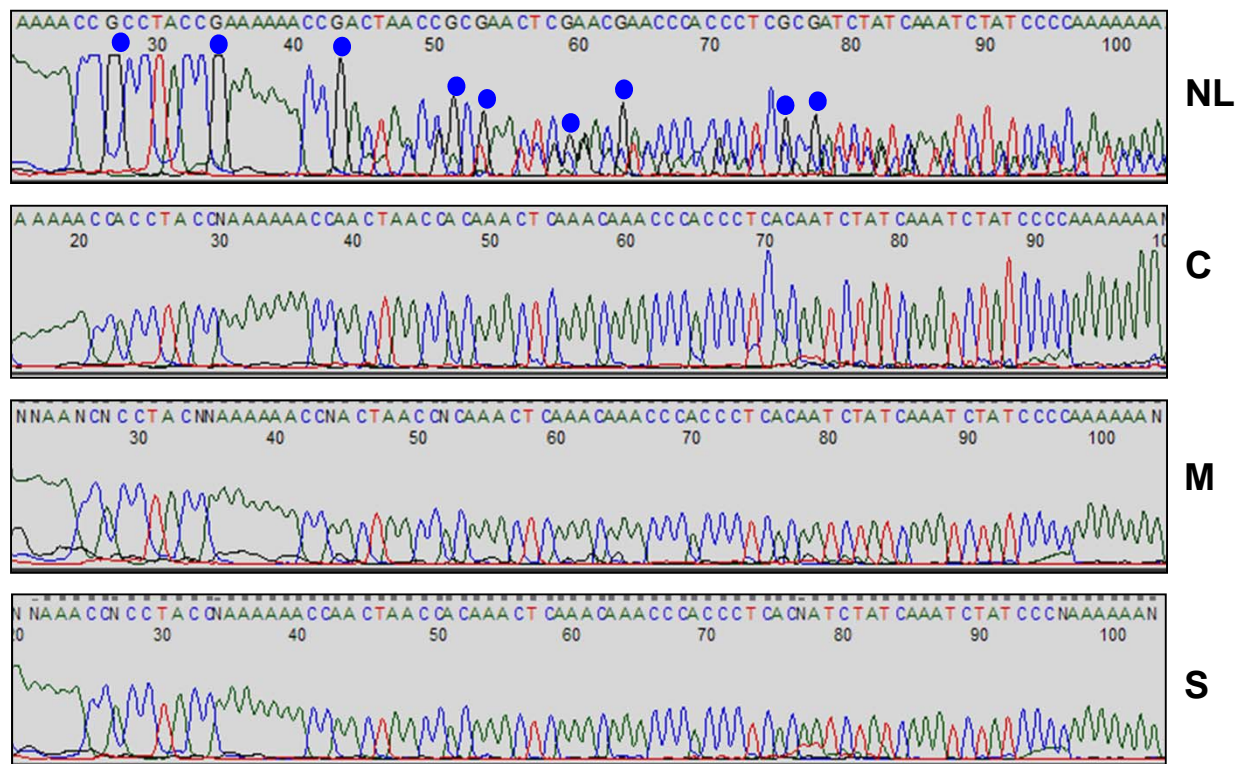



C

NEFH

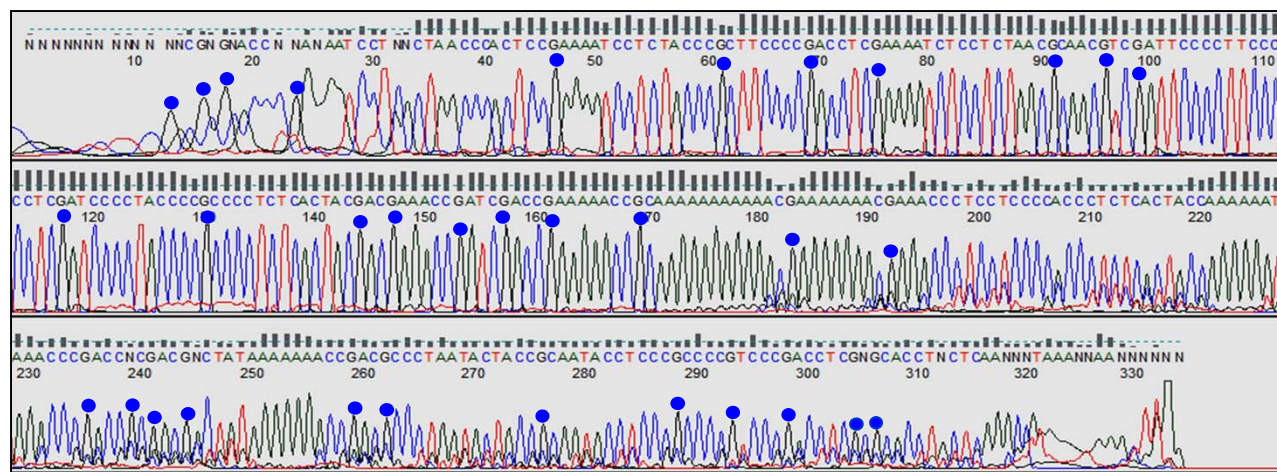

NL

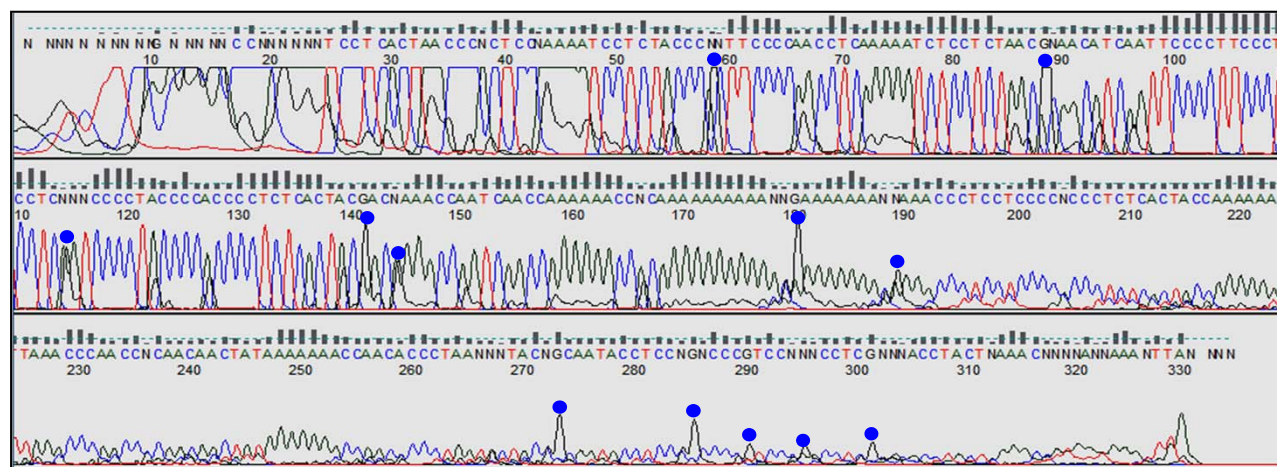

C



**A**

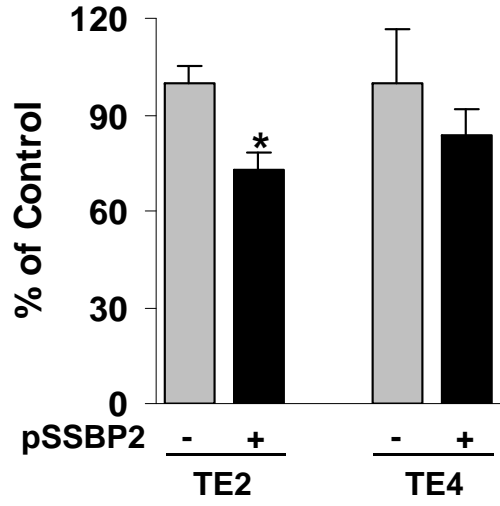

**B**

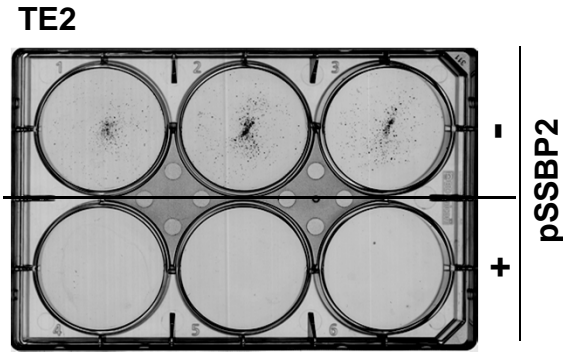

**C**

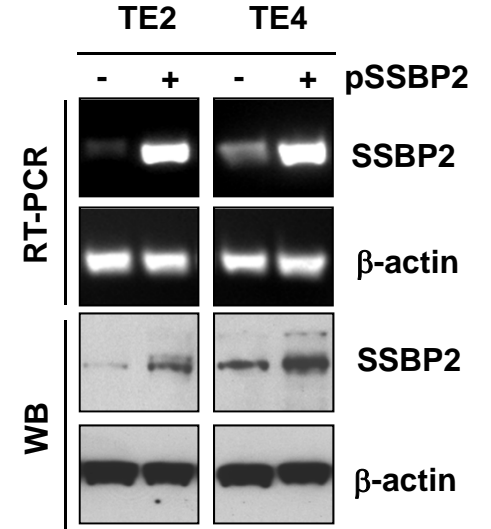



**A**

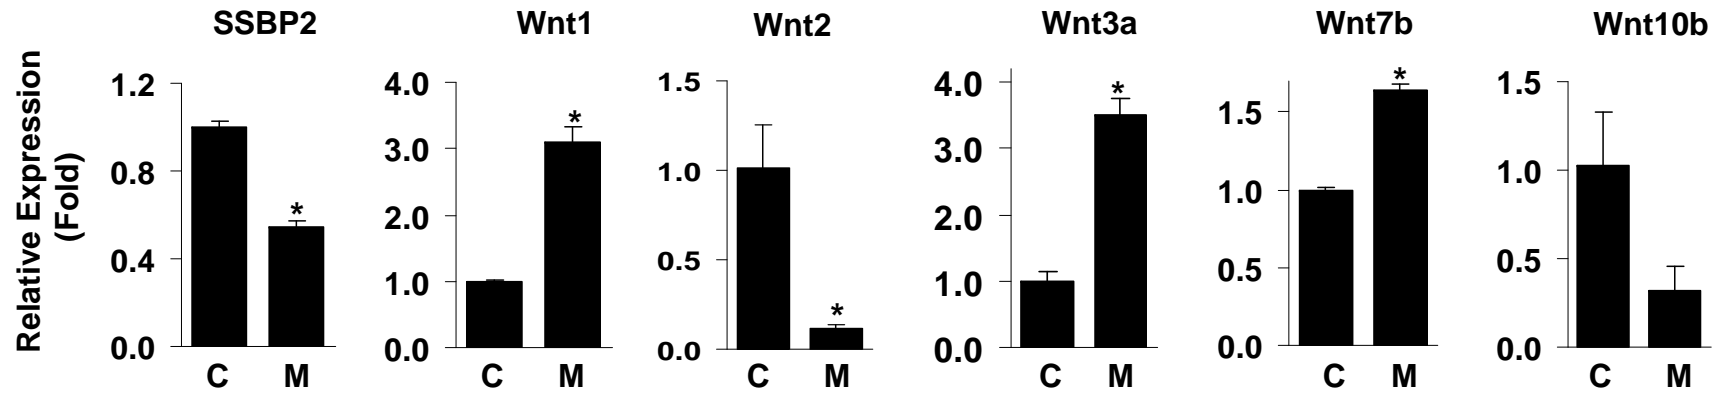

**B**

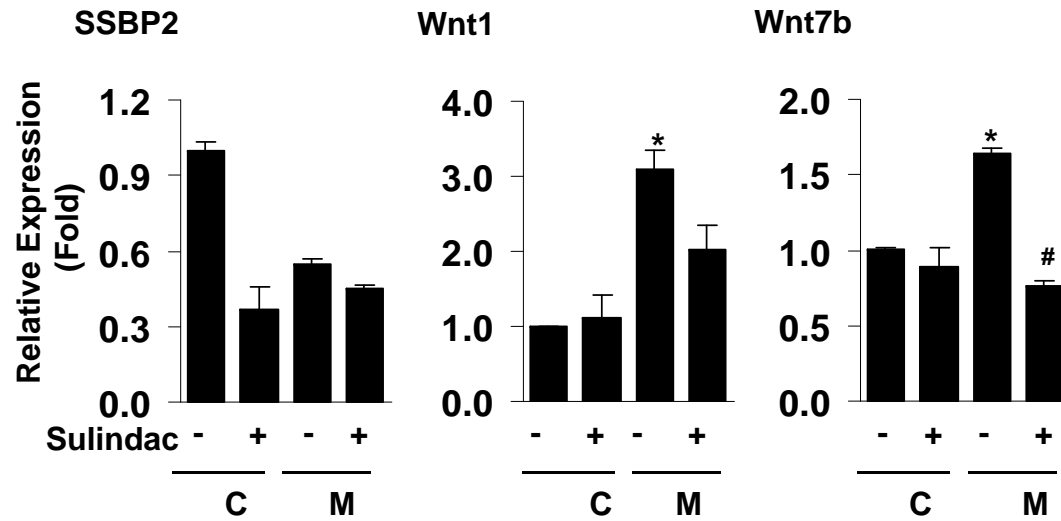

**C**

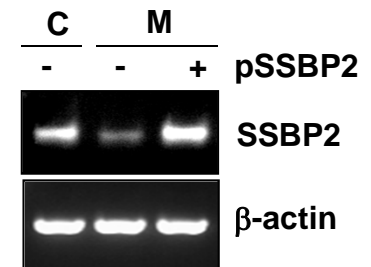

Fig. S4

**A**

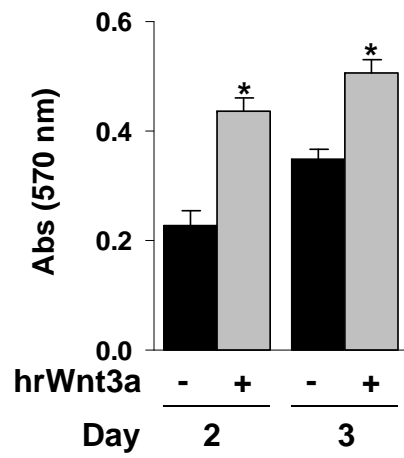

**B**

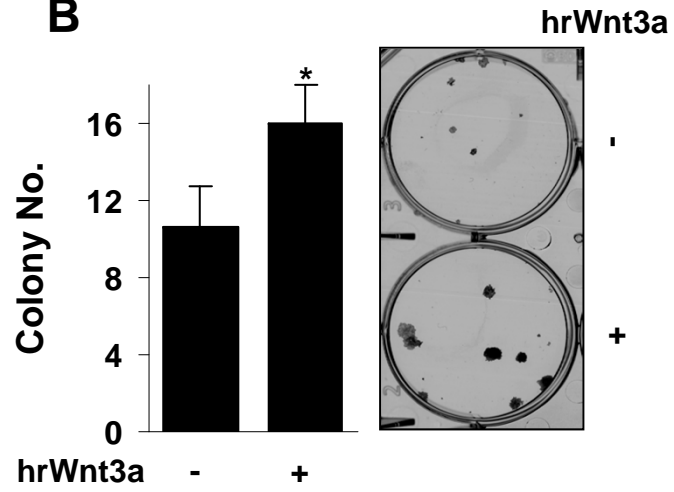

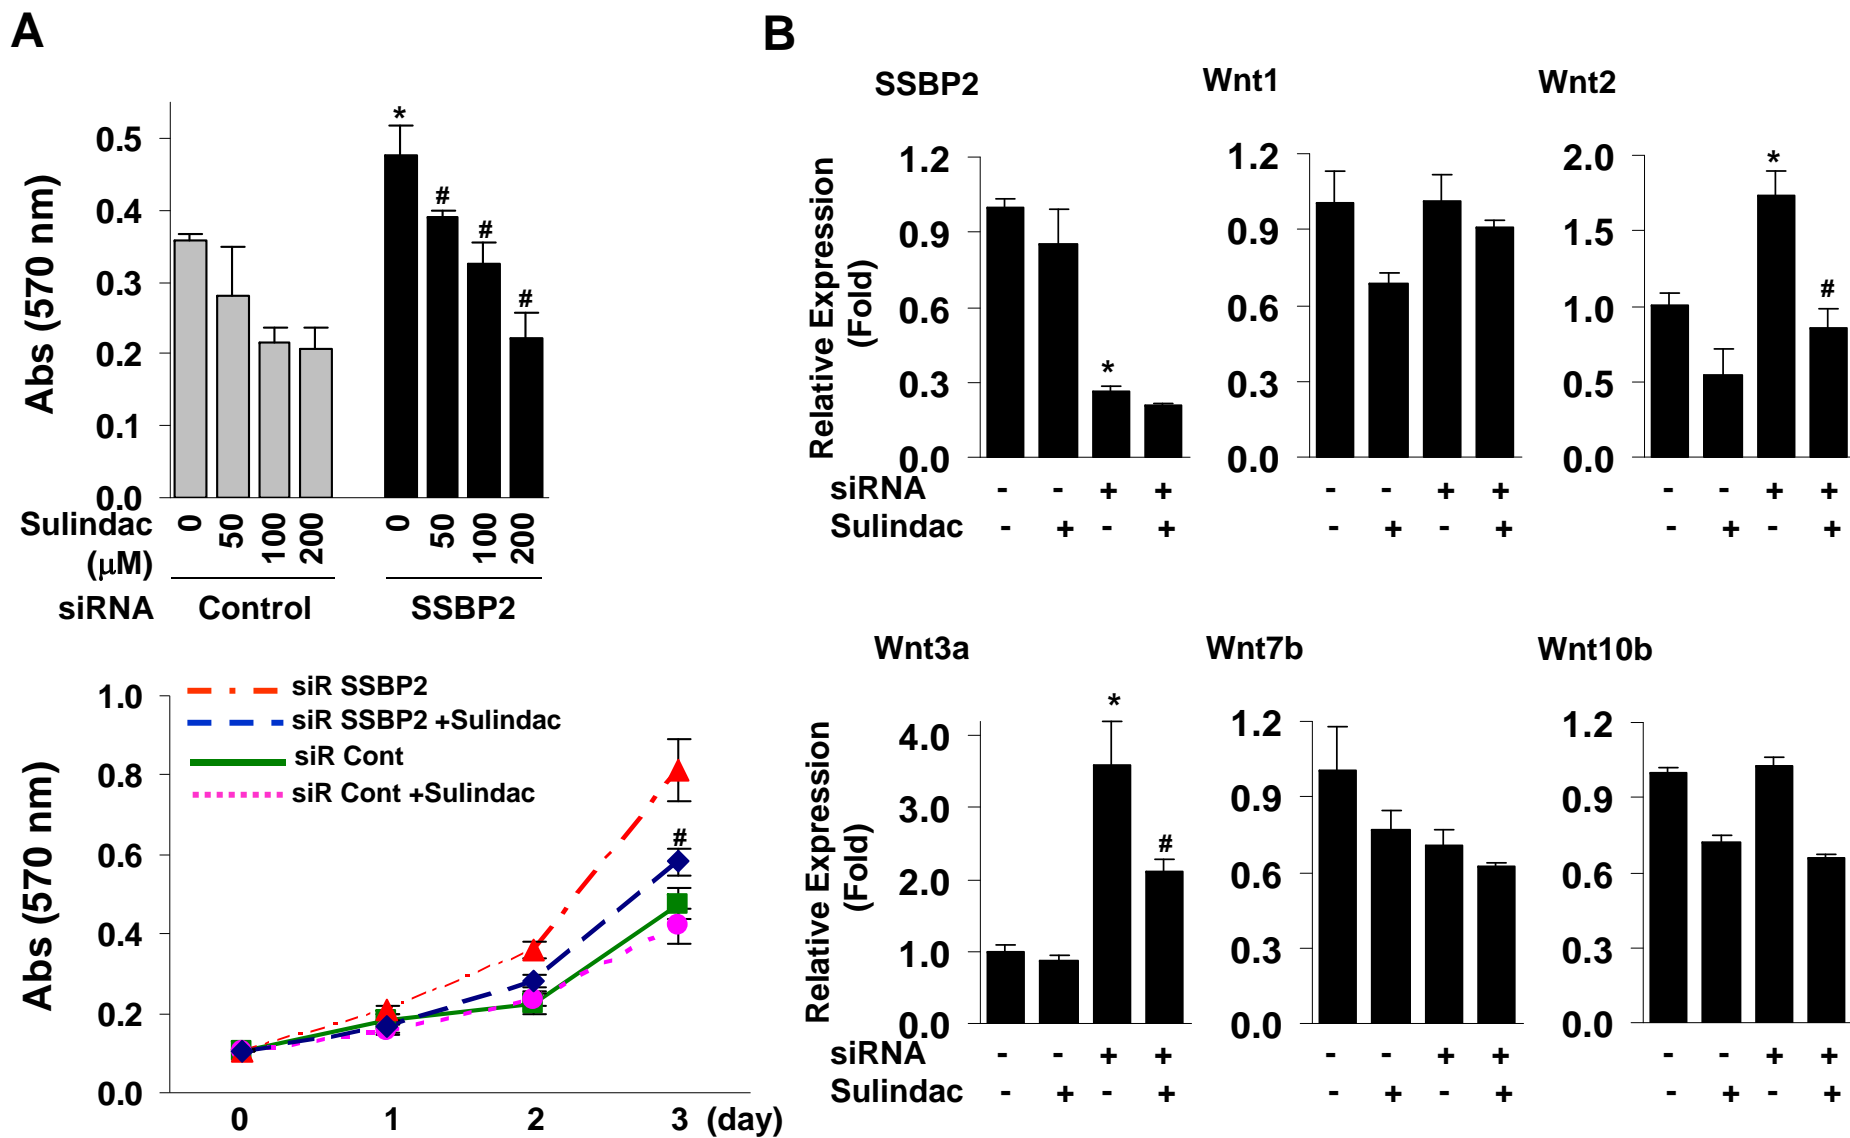

Fig. S6

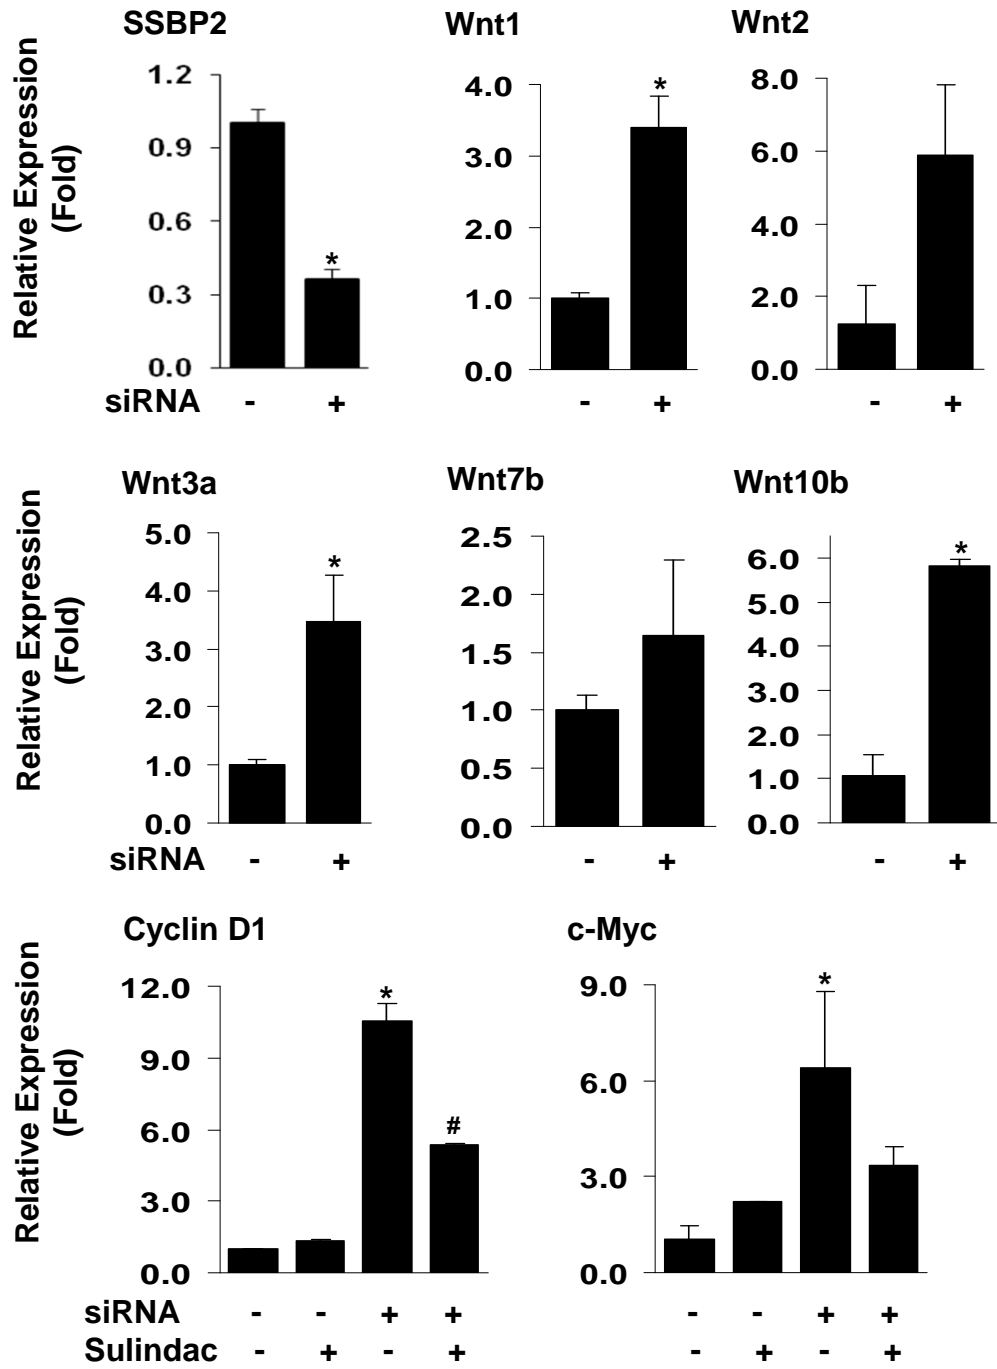

## Supplemental Figure Legends

**Figure S1. Bisulfite-sequencing results of PGP9.5, HOP/OB1 and NEFH.** DNA methylation in the PGP9.5 promoter (A), but not in the HOP/PB1 promoter (B) was observed in the Het-1A cells regardless of CSE exposure. In the NEFH promoter (C), methylated CpGs were observed in 12 of 33 CpGs analyzed in the control-Het-1A cells, so NEFH was methylation-positive in the control-Het-1A cells. *In vitro* methylated, bisulfite-treated human normal lymphocyte DNA (NL) was used as a positive control for gene methylation. C, control-Het-1A cells; M, MSE-Het-1A cells; S, SSE-Het-1A cells. Filled circle, methylated CpG; \*, 12-13 new methylated cytosines by MSE or SSE exposure.

**Figure S2. Tumor suppressive activity of SSBP2 in TE2 and TE4 cells.** A, pSSBP2 (+) or empty vector control (-) were transfected into TE2 and TE4 cells where basal level of SSBP2 was barely (TE2) and clearly detected (TE4), and after 3 days of incubation, cell growth was examined by MTT assay. Ectopic SSBP2 expression inhibited about 30% of the TE1 cell growth, but no significant difference was observed in TE4 cell growth. \*,  $P < 0.05$  compared to empty vector control (*t*-test). B, SSBP2 over-expression markedly decreased colony formation in TE2 cells. Colony focus assays were performed after incubation in the presence of G418 (500  $\mu\text{g}/\text{ml}$ ) for two weeks. Colonies were fixed and stained with 0.4% crystal violet solution (MeOH/Acetic acid, 3:1), and photographed. C, To confirm the expression of SSBP2, TE2 and TE4 cells were harvested 48 hr after transfection, and RT-PCR and western blotting were performed.

**Figure S3. Expression level of proteins in Wnt signaling.** A, In the control- and MSE-Het-1A cells, the transcriptional expression of indicated Wnt members was examined. The level of Wnt1, Wnt3a, Wnt7b in the MSE-Het-1A cells was significantly higher than in the control, but the level of Wnt2 and Wnt10b was decreased. C, control-Het-1A cells; M, MSE-Het-1A cells. Relative expression (Fold) was calculated by comparing the ratios of mRNA expression of genes to an internal control gene,  $\beta$ -actin. Experiments were done in duplicate, and independent experiments were performed twice. Values indicate means  $\pm$  SD. \*,  $P < 0.05$  compared to the control-Het-1A cells (*t*-test). B, Sulindac (100  $\mu\text{M}$ ), a Wnt pathway-specific inhibitor,<sup>25</sup> inhibited the expression of Wnt1 and Wnt7b increased in the MSE-Het-1A cells, whereas it did not have



significant effect on the transcriptional level of SSBP2 and other Wnt members (data not shown). **C**, SSBP2 expression in cells transfected with or without pSSBP2.

**Figure S4. Wnt3a increases cell growth.** hrWnt3a (100 ng/ml) was added for 3 days into Het-1A cells (passage +24) (**A**), and for 18 days in TE2 cells (**B**), and the MTT and colony focus assay, respectively, were performed.

**Figure S5. SSBP2 gene knock-down in HEK293 cells.** **A**, A siRNA pool targeting SSBP2 and a non-targeting control were transfected into the HEK293. After 4 hrs of transfection, Sulindac was treated at the indicated concentrations and incubated for further 48 hr (**upper**). Sulindac (100  $\mu$ M) was added for up to 3 days (**lower**). Cell growth was assessed by the MTT assay. Experiments were done in four replicates, and repeated twice. Values indicate means  $\pm$  SD. \*,  $P < 0.05$  compared to cells transfected with control siRNA in the absence of Sulindac (*t*-test); #,  $P < 0.05$  compared to cells transfected with SSBP2 siRNA in the absence of Sulindac. **B**, HEK293 cells were transfected with a non-targeting control (-) or SSBP2 siRNA (+), and incubated for 48 hrs. The mRNA level of Wnt members were examined by real time-RT-PCR analysis. The mRNA level of Wnt2 and Wnt3a was increased by SSBP2 siRNA transfection, which was decreased by Sulindac treatment. The expression level of the other genes was not significantly changed. \*,  $P < 0.05$  compared to the non-targeting control-transfected cells.

**Figure S6. SSBP2 gene knock-down in Het-1A cells.** Het-1A cells (passage +32) were transfected with a non-targeting control (-) or SSBP2 siRNA (+). After 4 hrs of transfection, Sulindac (100  $\mu$ M) was added and incubated for a further 48 hr. The mRNA levels of Wnt members were examined by real time-RT-PCR analysis. The mRNA levels of Wnt1, Wnt3a and Wnt10b were significantly increased by SSBP2 siRNA transfection, whereas Sulindac did not have a significant effect on expression of Wnt. The levels of Cyclin D1 and c-Myc were also increased by SSBP2 knock-down, but TCF1 and MMP-7 expression was not affected by SSBP2 siRNA transfection. Relative expression (Fold) was calculated by comparing the ratios of mRNA expression of genes to an internal control gene,  $\beta$ -actin. Experiments were done in duplicate, and independent experiments were performed twice. Values indicate means  $\pm$  SD. \*,  $P < 0.05$  compared to cells transfected with control siRNA in the absence of Sulindac (*t*-test); #,  $P < 0.05$  compared to cells transfected with SSBP2 siRNA in the absence of Sulindac.
